# Supplementary material for: Analysis and prediction of improved SEIR transmission dynamics model: taking the second outbreak of COVID-19 in Italy as an example
Source: Front Public Health. 2023 Aug 24;11:1223039. doi: 10.3389/fpubh.2023.1223039 (PMC10484606; doi:10.3389/fpubh.2023.1223039)
Supplement: Supplementary file 1 [file Table_1.XLS]

Country	Infected	Dead	Recovered	Date
Italy	293025	35658	215954	2020/9/18
Italy	291442	35645	215265	2020/9/17
Italy	288761	35624	213950	2020/9/15
Italy	287753	35610	213634	2020/9/14
Italy	286297	35603	213191	2020/9/13
Italy	284796	35597	212432	2020/9/12
Italy	283180	35587	211885	2020/9/11
Italy	281583	35577	211272	2020/9/10
Italy	280153	35563	210801	2020/9/9
Italy	278784	35553	210238	2020/9/8
Italy	277634	35541	210015	2020/9/7
Italy	276338	35534	209610	2020/9/6
Italy	274644	35518	209027	2020/9/5
Italy	272912	35507	208490	2020/9/4
Italy	271515	35497	208201	2020/9/3
Italy	270189	35491	207944	2020/9/2
Italy	268218	35477	208536	2020/8/31
Italy	266853	35473	208224	2020/8/30
Italy	265409	35472	206902	2020/8/29
Italy	263949	35463	206554	2020/8/28
Italy	262540	35458	206329	2020/8/27
Italy	261174	35445	206015	2020/8/26
Italy	260298	35441	205662	2020/8/25
Italy	259345	35437	205470	2020/8/24
Italy	258136	35430	205203	2020/8/23
Italy	257065	35427	204960	2020/8/22
Italy	256118	35418	204686	2020/8/21
Italy	255278	35412	204506	2020/8/20
Italy	254636	35405	204142	2020/8/19
Italy	254235	35400	203968	2020/8/18
Italy	253915	35396	203786	2020/8/17
Italy	253438	35392	203640	2020/8/16
Italy	252809	35234	203326	2020/8/15
Italy	252235	35231	202923	2020/8/14
Italy	251713	35225	202697	2020/8/13
Italy	251237	35215	202461	2020/8/12
Italy	250825	35209	202248	2020/8/11
Italy	250566	35205	202098	2020/8/10
Italy	250103	35203	201947	2020/8/9
Italy	250103	35203	201947	2020/8/8
Italy	249204	35187	201323	2020/8/7
Italy	248803	35181	200976	2020/8/6
Italy	248419	35171	200766	2020/8/5
Italy	248229	35166	200589	2020/8/4
Italy	248070	35154	200460	2020/8/3
Italy	247832	35146	200229	2020/8/2
Italy	247537	35141	199974	2020/8/1
Italy	247158	35132	199796	2020/7/31
Italy	246776	35129	199031	2020/7/30
Italy	246488	35123	198756	2020/7/29
Italy	246286	35112	198593	2020/7/28
Italy	246118	35107	198446	2020/7/27
Italy	245864	35102	198320	2020/7/26
Italy	245590	35097	198192	2020/7/25
Italy	245338	35092	197842	2020/7/24
Italy	245032	35082	197628	2020/7/23
Italy	244752	35073	197431	2020/7/22
Italy	244624	35058	197162	2020/7/21
Italy	244434	35045	196949	2020/7/20
Italy	244216	35042	196806	2020/7/19
Italy	243967	35028	196483	2020/7/18
Italy	243736	35017	196246	2020/7/17
Italy	243506	34997	196016	2020/7/16
Italy	243344	34984	195441	2020/7/15
Italy	243230	34967	195106	2020/7/14
Italy	243061	34954	194928	2020/7/13
Italy	242827	34945	194579	2020/7/12
Italy	242639	34938	194273	2020/7/11
Italy	242363	34926	193978	2020/7/10
Italy	242149	34914	193640	2020/7/9
Italy	241956	34899	192815	2020/7/8
Italy	241819	34869	192241	2020/7/7
Italy	241611	34861	192108	2020/7/6
Italy	241419	34854	191944	2020/7/5
Italy	241184	34833	191467	2020/7/4
Italy	240961	34818	191083	2020/7/3
Italy	240760	34788	190717	2020/7/2
Italy	240578	34767	190248	2020/7/1
Italy	240436	34744	189196	2020/6/30
Italy	240310	34738	188891	2020/6/29
Italy	240136	34716	188584	2020/6/28
Italy	239961	34708	187615	2020/6/27
Italy	239706	34678	186725	2020/6/26
Italy	239410	34644	186111	2020/6/25
Italy	238833	34675	184585	2020/6/24
Italy	238720	34657	183426	2020/6/23
Italy	238499	34634	182893	2020/6/22
Italy	238275	34610	182453	2020/6/21
Italy	238011	34561	181907	2020/6/20
Italy	238159	34514	180544	2020/6/19
Italy	237828	34448	179455	2020/6/18
Italy	237500	34405	178526	2020/6/17
Italy	237290	34371	177010	2020/6/16
Italy	236989	34345	176370	2020/6/15
Italy	236651	34301	174865	2020/6/14
Italy	236651	34301	174865	2020/6/13
Italy	236142	34167	171338	2020/6/12
Italy	235763	34114	169939	2020/6/11
Italy	235561	34043	168646	2020/6/10
Italy	235278	33964	166584	2020/6/9
Italy	234998	33899	165837	2020/6/8
Italy	234801	33846	165078	2020/6/7
Italy	234531	33774	163781	2020/6/6
Italy	234013	33689	161895	2020/6/5
Italy	233836	33601	160938	2020/6/4
Italy	233515	33530	160092	2020/6/3
Italy	233197	33475	158355	2020/6/2
Italy	232248	33229	152844	2020/5/30
Italy	232248	33229	152844	2020/5/29
Italy	231139	33072	147101	2020/5/28
Italy	230555	32955	144658	2020/5/27
Italy	230158	32877	141981	2020/5/26
Italy	229858	32785	140479	2020/5/25
Italy	229327	32735	138840	2020/5/24
Italy	228658	32616	136720	2020/5/23
Italy	228006	32486	134560	2020/5/22
Italy	227364	32330	132282	2020/5/21
Italy	226699	32169	129401	2020/5/20
Italy	225886	32007	127326	2020/5/19
Italy	225435	31908	125176	2020/5/18
Italy	224760	31763	122810	2020/5/17
Italy	223885	31610	120205	2020/5/16
Italy	223096	31368	115288	2020/5/15
Italy	222104	31106	112541	2020/5/14
Italy	221216	30911	109039	2020/5/13
Italy	219070	30560	105186	2020/5/11
Italy	218268	30395	103031	2020/5/10
Italy	217185	30201	99023	2020/5/9
Italy	215858	29958	96276	2020/5/8
Italy	214457	29684	93245	2020/5/7
Italy	213013	29315	85231	2020/5/6
Italy	211938	29079	82879	2020/5/5
Italy	210717	28884	81654	2020/5/4
Italy	209328	28710	79914	2020/5/3
Italy	209328	28710	79914	2020/5/2
Italy	205463	27967	75945	2020/5/1
Italy	203591	27682	71252	2020/4/30
Italy	201505	27359	68941	2020/4/29
Italy	199414	26977	66624	2020/4/28
Italy	197675	26644	64928	2020/4/27
Italy	195351	26384	63120	2020/4/26
Italy	192994	25969	60498	2020/4/25
Italy	189973	25549	57576	2020/4/24
Italy	187327	25085	54543	2020/4/23
Italy	183957	24648	51600	2020/4/22
Italy	181228	24114	48877	2020/4/21
Italy	178972	23660	47055	2020/4/20
Italy	175925	23227	44927	2020/4/19
Italy	172434	22745	42727	2020/4/18
Italy	168941	22170	40164	2020/4/17
Italy	165155	21645	38092	2020/4/16
Italy	162488	21067	37130	2020/4/15
Italy	159516	20465	35435	2020/4/14
Italy	156363	19899	34211	2020/4/13
Italy	152271	19468	32534	2020/4/12
Italy	147577	18849	30455	2020/4/11
Italy	143626	18279	28470	2020/4/10
Italy	139422	17669	26491	2020/4/9
Italy	135586	17127	24392	2020/4/8
Italy	132547	16523	22837	2020/4/7
Italy	128948	15887	21815	2020/4/6
Italy	124632	15362	20996	2020/4/5
Italy	119827	14681	19758	2020/4/4
Italy	115242	13915	18278	2020/4/3
Italy	110574	13155	16847	2020/4/2
Italy	105792	12428	15729	2020/4/1
Italy	101739	11591	14620	2020/3/31
Italy	97689	10779	13030	2020/3/30
Italy	92472	10023	12384	2020/3/29
Italy	86498	9134	10950	2020/3/28
Italy	80589	8215	10361	2020/3/27
Italy	74386	7503	9362	2020/3/26
Italy	69176	6820	8326	2020/3/25
Italy	63927	6077	7432	2020/3/24
Italy	59138	5476	7024	2020/3/23
Italy	53578	4825	6072	2020/3/22
Italy	47021	4032	5129	2020/3/21
Italy	41035	3405	4440	2020/3/20
Italy	36455	2978	4025	2020/3/19
Italy	31506	2503	2941	2020/3/18
Italy	27980	2158	2749	2020/3/17
Italy	24938	1809	2335	2020/3/16
Italy	21270	1441	1966	2020/3/15
Italy	17660	1266	1439	2020/3/14
Italy	15385	1016	1258	2020/3/13
Italy	12462	827	1045	2020/3/12
Italy	10283	631	1004	2020/3/11
Italy	9220	463	724	2020/3/10
Italy	7424	366	622	2020/3/9
Italy	6012	233	589	2020/3/8
Italy	4680	197	523	2020/3/7
Italy	3927	148	414	2020/3/6
Italy	3144	107	276	2020/3/5
Italy	2546	79	160	2020/3/4
Italy	2084	52	149	2020/3/3
Italy	1713	41	83	2020/3/2
Italy	1128	29	50	2020/3/1
Italy	889	21	46	2020/2/29
Italy	653	17	45	2020/2/28
Italy	470	12	3	2020/2/27
Italy	323	11	2	2020/2/26
Italy	232	7	2	2020/2/25
Italy	215	4	2	2020/2/24
Italy	79	2	0	2020/2/23
Italy	20	1	0	2020/2/22
Italy	3	0	0	2020/2/21
Italy	3	0	0	2020/2/20
Italy	3	0	0	2020/2/19
Italy	3	0	0	2020/2/18
Italy	3	0	0	2020/2/17
Italy	3	0	0	2020/2/16
Italy	3	0	0	2020/2/15
Italy	3	0	0	2020/2/14
